# Supplementary material for: Melanin-mimetic multicolor and low-toxicity hair dye
Source: Royal Society of Chemistry journal article supplement (doi:10.1039/c9ra07466j), 2019-01-01
Supplement: c9ra07466j1.pdf [file c9ra07466j1.pdf]

## Supporting information

### Melanin-Mimetic Multicolor and Low-toxic Hair Dye

Yingying Dong,<sup>‡a</sup> Yan Qiu,<sup>‡b</sup> Die Gao<sup>b</sup>, Kailian Zhang,<sup>b</sup> Kai Zhou,<sup>c</sup> Honggang Yin,<sup>b</sup> Gaoyi Yi,<sup>b</sup> Jun Li,<sup>\*a</sup> Zhining Xia<sup>d</sup> and Qifeng Fu<sup>\*b</sup>

<sup>a</sup> Institute of Engineering Thermophysics, School of Energy and Power Engineering, Chongqing University, Chongqing 400030, China. E-mail: lijun@cqu.edu.cn (J. Li)

<sup>b</sup> School of Pharmacy, Southwest Medical University, Luzhou, Sichuan, 646000, China. E-mail: fuqifeng1990@163.com (Q. Fu)

<sup>c</sup> Analytical and Testing Center, Chongqing University, Chongqing, 401331, China

<sup>d</sup> School of Pharmaceutical Sciences, Chongqing University, Chongqing, 401331, China

<sup>‡</sup> These authors contributed equally

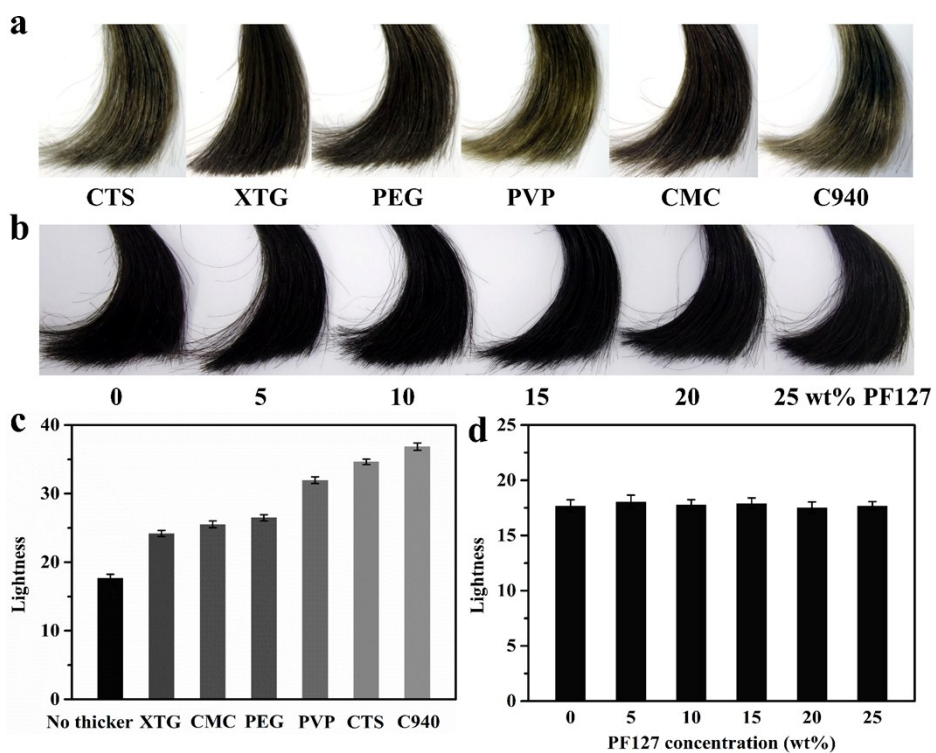

**Figure S1** (a) Photographs and (c) lightness of PDA coated hair in the presence of common thickeners, including chitosan (CTS), xanthan gum (XTG), polyethylene glycol (PEG), polyvinylpyrrolidone (PVP), sodium carboxymethylcellulose (CMC) and carbomer 940 (C940). (b) Photographical images and (d) lightness of PDA coated hair obtained in the presence of different concentration of PF127.

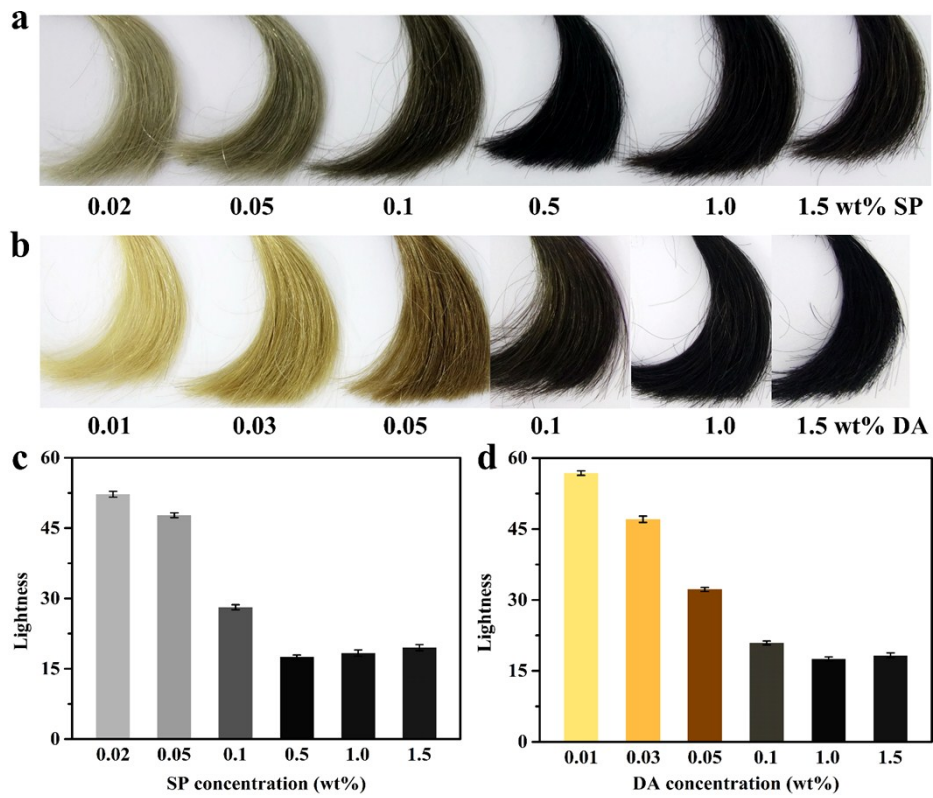

**Figure S2** Photographical images and lightness of PDA/PF127 hydrogel coated hair obtained by using different concentration of SP and DA.

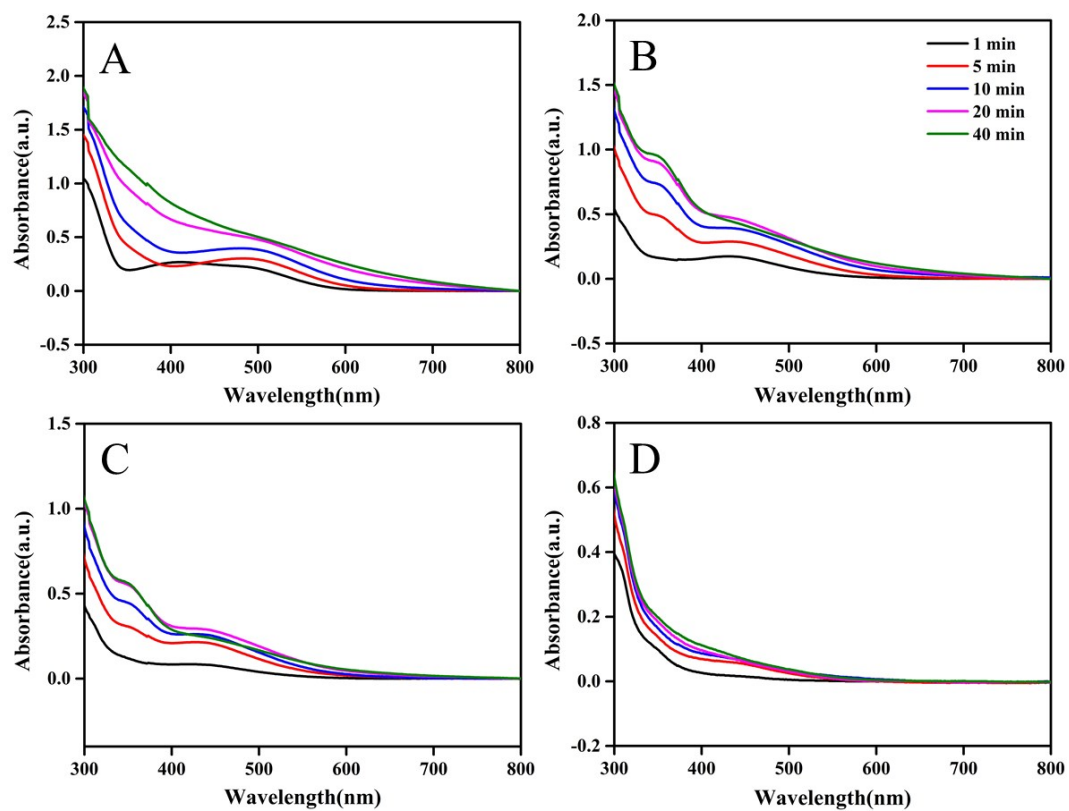

**Figure S3** Time-dependent UV-visible spectra of PDA/cysteine solutions with different cysteine mass ratio in 40 min. DA, SP and cysteine were co-dissolved in the sodium acetate buffer (50 mM, pH=5). Samples: (A) PDA without cysteine; (B) PDA/cysteine 2:1; (C) PDA/cysteine 1:1; (D) PDA/cysteine 2:3.

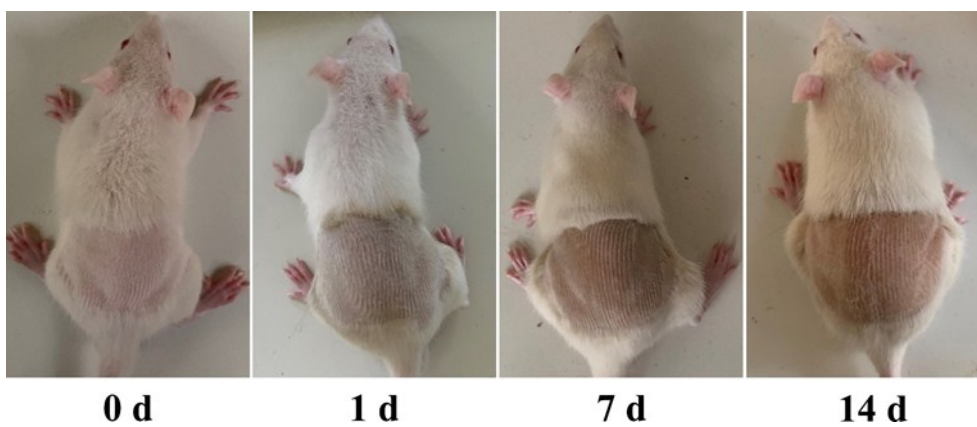

**Figure S4** Photographs of typical mice treated with PDA/PF127 hydrogel for 0, 1, 7, and 14 days.

**Table S1.** The skin reaction and mortality for the acute dermal toxicity test of the PDA based hair colorants. <sup>[a]</sup>

| Materials     | Erythema/Oedema |    |    |     | Death |     |     |      |
|---------------|-----------------|----|----|-----|-------|-----|-----|------|
|               | 0 d             | 1d | 7d | 14d | 0 d   | 1 d | 7 d | 14 d |
| PDA solutions | -               | -  | -  | -   | -     | -   | -   | -    |
| PDA hydrogels | -               | -  | -  | -   | -     | -   | -   | -    |

[a] “-” no erythema, oedema or death.
